# Supplementary material for: Circulating tumor cell-derived organoids: Current challenges and promises in medical research and precision medicine
Source: PubMed Central journal article supplement — Biochim Biophys Acta Rev Cancer. Author manuscript; Available in PMC 2018 Jul 20. (PMC6054479; doi:10.1016/j.bbcan.2017.12.005), 2018-01-31
Supplement: NIHMS970704-supplement.pdf [file NIHMS970704-supplement.pdf]

## **Multiple files are bound together in this PDF Package.**

Adobe recommends using Adobe Reader or Adobe Acrobat version 8 or later to work with documents contained within a PDF Package. By updating to the latest version, you'll enjoy the following benefits:

- Efficient, integrated PDF viewing
- Easy printing
- Quick searches

**Don't have the latest version of Adobe Reader?**

**[Click here to download the latest version of Adobe Reader](#)**

**If you already have Adobe Reader 8,  
click a file in this PDF Package to view it.**
